Development 137, 1775 (2010) doi:10.1242/dev.053116

## Abnormal hair follicle development and altered cell fate of follicular keratinocytes in transgenic mice expressing $\Delta Np63\alpha$

**Rose-Anne Romano, Kirsten Smalley, Song Liu and Satrajit Sinha**

There was a technical problem with the ePress version of *Development* **137**, 1431-1439 published on 24 March 2010.

A number of Greek symbols were missing from the text and figure headings in the Results section.

A replacement ePress article was published on 31 March 2010. The online issue and print copy are correct.

We apologise to authors and readers for this error.
